# Supplementary material for: Facile solvothermal synthesis of ultrathin LiFexMn1−xPO4 nanoplates as advanced cathodes with long cycle life and superior rate capability
Source: Royal Society of Chemistry journal article supplement (doi:10.1039/c5ta05358g), 2015-01-01
Supplement: c5ta05358g1.pdf [file c5ta05358g1.pdf]

## Supporting Information

### Facile solvothermal synthesis of ultrathin $\text{LiFe}_x\text{Mn}_{1-x}\text{PO}_4$ nanoplates as advanced cathodes with long cycle life and superior rate capability

Longhuan Liao,<sup>a</sup> Hongtao Wang,<sup>a</sup> Hui Guo,<sup>a</sup> Peiyi Zhu,<sup>b</sup> Jian Xie,<sup>\*ac</sup> Chuanhong Jin,<sup>a</sup> Shichao Zhang,<sup>d</sup> Gaoshao Cao,<sup>c</sup> Tiejun Zhu<sup>a</sup> and Xinbing Zhao<sup>\*ac</sup>

#### This file includes:

Synthesis of  $\text{LiFe}_x\text{Mn}_{1-x}\text{PO}_4$  ( $x=0.05, 0.10, 0.15$ )

Fig. S1–S6 and Table S1, S2

---

\*E-mail: xiejian1977@zju.edu.cn, zhaorb@zju.edu.cn

**Preparation of  $\text{LiFe}_x\text{Mn}_{1-x}\text{PO}_4$  ( $x=0.05, 0.10, 0.15$ ):** For the synthesis of  $\text{LiFe}_x\text{Mn}_{1-x}\text{PO}_4$  (LFMP), a two-pot mixing route was first used to prepare the respective precursor solution of  $\text{LiMnPO}_4$  and  $\text{LiFePO}_4$ , followed by mixing the two precursor solutions before the solvothermal reactions. In a typical synthesis of  $\text{LiFe}_{0.1}\text{Mn}_{0.9}\text{PO}_4$  (LFMP-0.10), the preparation of the precursor solution of  $\text{LiMnPO}_4$  can be divided into following steps: first, ethylene glycol (EG) solutions of  $\text{LiOH}$  and  $\text{H}_3\text{PO}_4$  were prepared separately by dissolving  $\text{LiOH}$  (0.027 mol) in EG (10 mL) and  $\text{H}_3\text{PO}_4$  (0.0099 mol) in EG (10 mL) with stirring (step 1); then, the  $\text{H}_3\text{PO}_4$  solution was dropwise added to the  $\text{LiOH}$  solution with vigorous stirring to form solution A1 (step 2); afterwards, a  $\text{MnSO}_4$  solution was prepared by dissolving  $\text{MnSO}_4$  (0.009 mol) in a mixed solvent of deionized (DI) water (5 mL) and EG (5 mL) with stirring (step 3); finally, the  $\text{MnSO}_4$  solution was added to solution A1 to form solution B1, the precursor solution of  $\text{LiMnPO}_4$  (step 4). In a separate experiment, a mixed solution of  $\text{LiOH}$  and  $\text{H}_3\text{PO}_4$  (solution A2) was first prepared by adding a EG (10 mL) solution of  $\text{H}_3\text{PO}_4$  (0.0011 mol) to a EG (10 mL) solution of  $\text{LiOH}$  (0.003 mol) under stirring (step 5); then, a  $\text{FeSO}_4$  solution, prepared by dissolving  $\text{FeSO}_4$  (0.001 mol) in EG (10 mL), was added to solution A2 under vigorous stirring to form solution B2, the precursor solution of  $\text{LiFePO}_4$  (step 6); finally, a mixed precursor solution (solution C) was prepared by mixing solution B1 and B2. After being stirred for 10 min, solution C was transferred to a Teflon-lined stainless steel autoclave (120 mL in capacity). The solvothermal reactions were conducted at 180 °C for 10 h. The white precipitate was collected by centrifugation, washed with DI water and absolute ethanol repeatedly, and dried at 60 °C for 12 h.  $\text{LiFe}_{0.05}\text{Mn}_{0.95}\text{PO}_4$  (LFMP-0.05) and  $\text{LiFe}_{0.15}\text{Mn}_{0.85}\text{PO}_4$  (LFMP-0.15) were synthesized with a similar method as  $\text{LiFe}_{0.1}\text{Mn}_{0.9}\text{PO}_4$ . For comparison, a one-pot mixing route was also applied to prepare the precursor solution of  $\text{LiFe}_{0.1}\text{Mn}_{0.9}\text{PO}_4$  by combining steps 1,2 with step 5, and steps 3,4 with step 6. Namely, the solutions of  $\text{MnSO}_4$  and  $\text{FeSO}_4$  were mixed at the very beginning of the precursor preparation stage while the other steps are kept same. The resulting  $\text{LiFe}_{0.1}\text{Mn}_{0.9}\text{PO}_4$  sample is named LFMP-0.10-A. Below is the schematic illustration of the synthetic route.

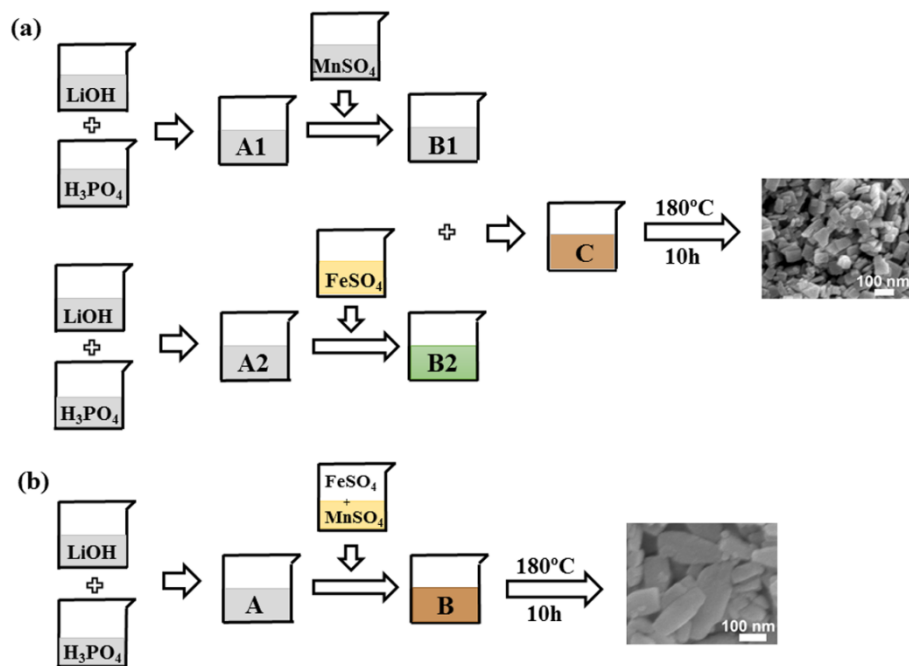

Schematic illustration of the synthetic route of  $\text{LiFe}_x\text{Mn}_{1-x}\text{PO}_4$ : (a) two-pot precursors mixing route and (b) one-pot precursors mixing route.

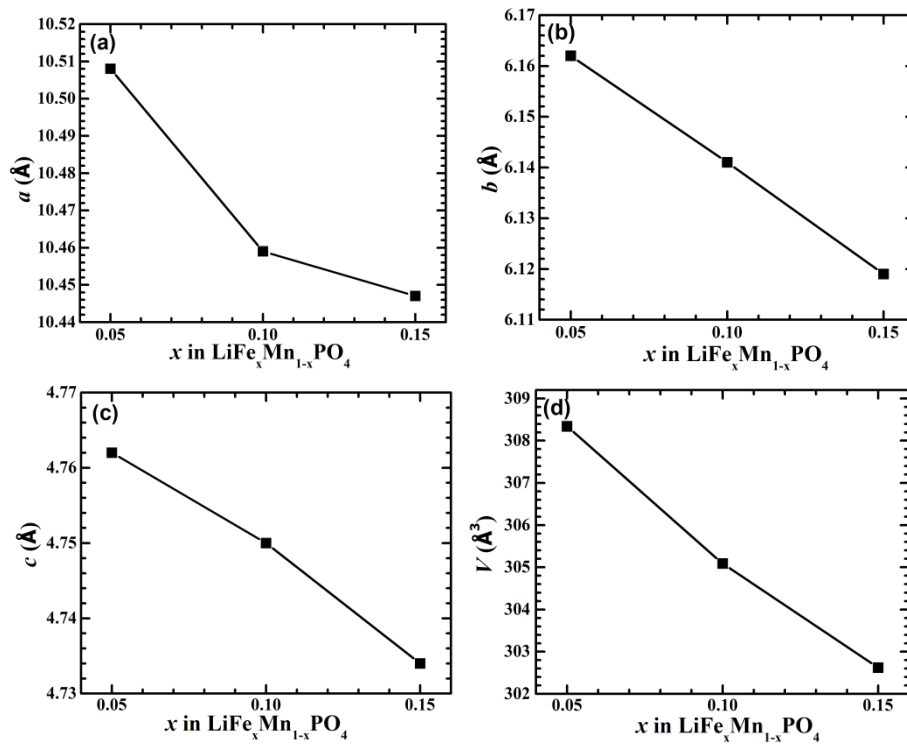

**Fig. S1** Lattice parameters of  $\text{LiFe}_x\text{Mn}_{1-x}\text{PO}_4$  ( $x=0.05, 0.10, 0.15$ ).

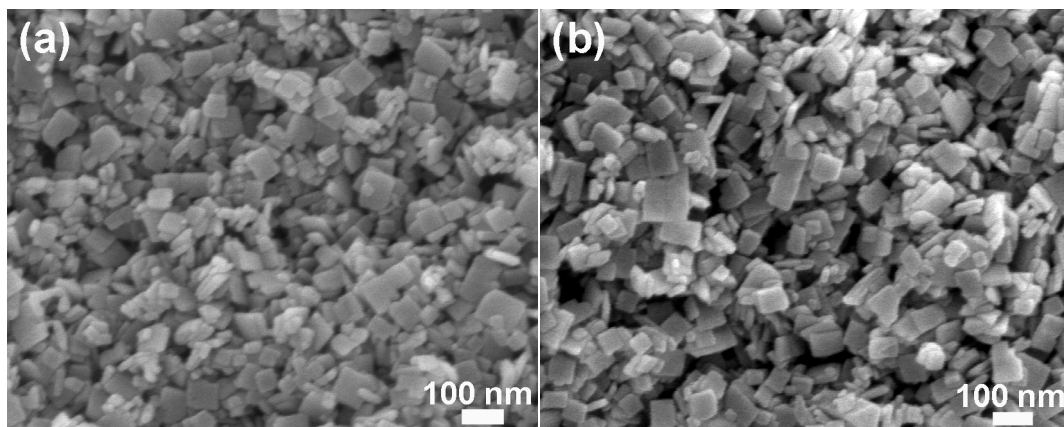

**Fig. S2** SEM images of LFMP-0.05 and LFMP-0.10.

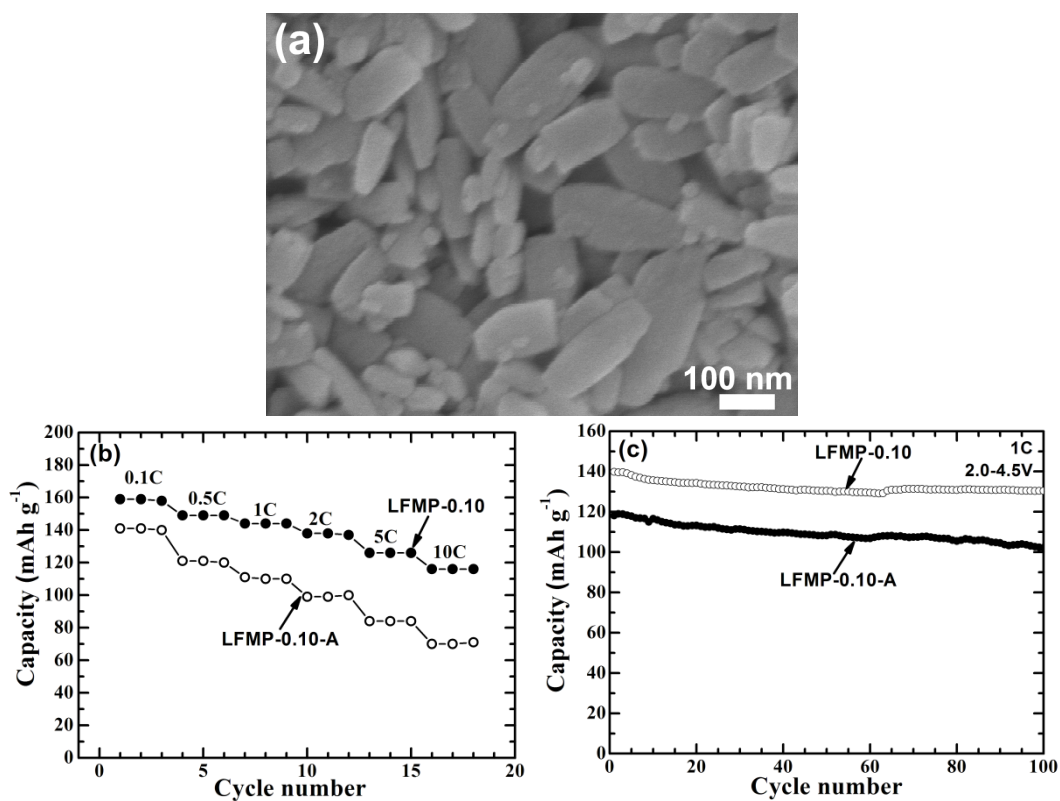

**Fig. S3** (a) SEM image of LFMP-0.10-A and comparisons of (b) rate capability and (c) cycling stability between LFMP-0.10 and LFMP-0.10-A.

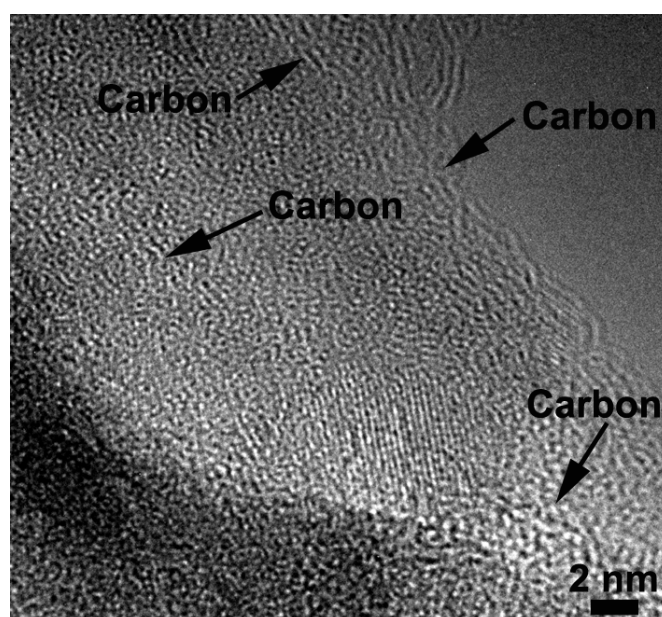

**Fig. S4** HRTEM image of LiFe<sub>0.15</sub>Mn<sub>0.85</sub>PO<sub>4</sub>/C showing discrete carbon.

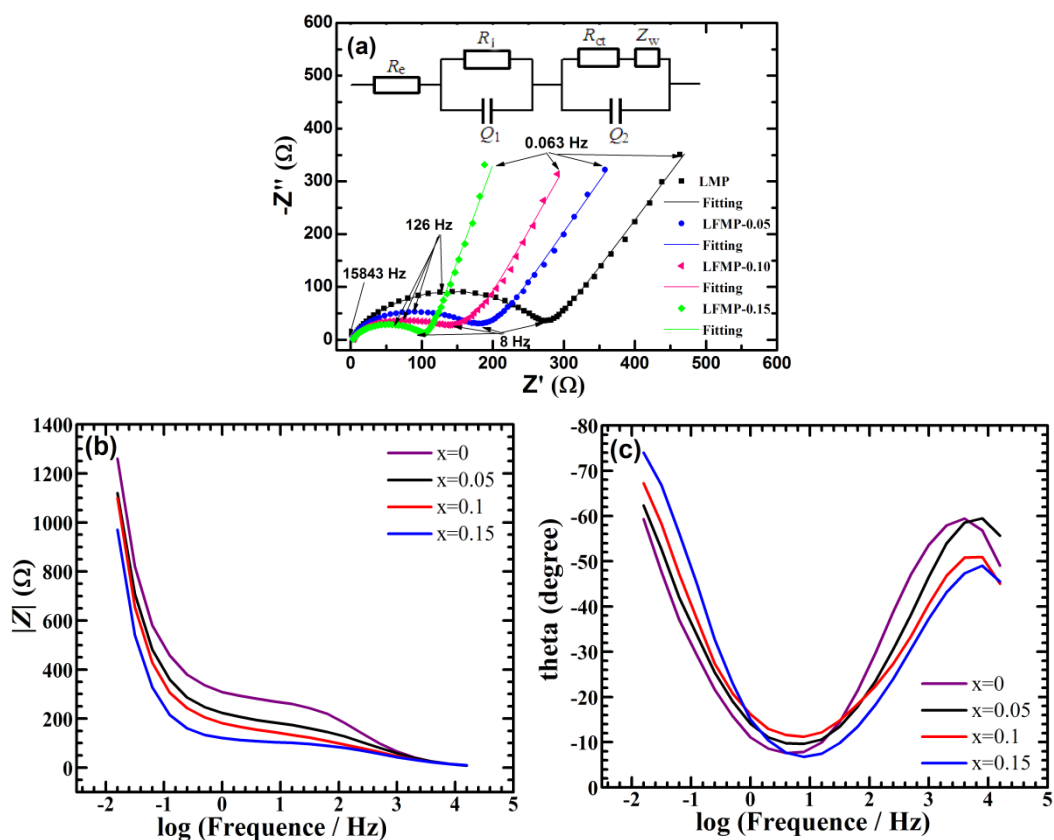

**Fig. S5** (a) Nyquist plots and (b, c) Bode plots  $\text{LiFe}_x\text{Mn}_{1-x}\text{PO}_4/\text{C}$ . The inset in (a) shows the equivalent circuit for the fitting of the Nyquist plot.

**Table S1** Fitting results of the Nyquist plots using the equivalent circuit.

| Sample    | $R_e$ ( $\Omega$ ) | $R_1$ ( $\Omega$ ) | $Q_1$                |      | $R_{ct}$ ( $\Omega$ ) | $Q_2$                |      |
|-----------|--------------------|--------------------|----------------------|------|-----------------------|----------------------|------|
|           |                    |                    | $Y$                  | $n$  |                       | $Y$                  | $n$  |
| LMP       | 3.2                | 57.1               | $1.9 \times 10^{-5}$ | 0.85 | 223.4                 | $3.0 \times 10^{-5}$ | 0.76 |
| LFMP-0.05 | 1.5                | 75.1               | $1.4 \times 10^{-5}$ | 0.82 | 116.0                 | $1.1 \times 10^{-4}$ | 0.70 |
| LFMP-0.10 | 2.5                | 55.7               | $2.1 \times 10^{-5}$ | 0.80 | 108.5                 | $3.0 \times 10^{-4}$ | 0.61 |
| LFMP-0.15 | 1.8                | 46.7               | $3.5 \times 10^{-5}$ | 0.73 | 63.5                  | $2.0 \times 10^{-4}$ | 0.62 |

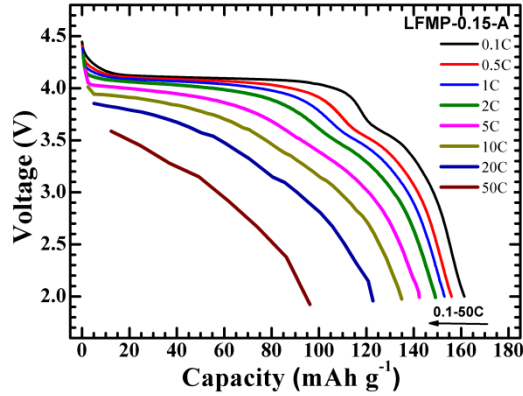

**Fig. S6** Rate capability of the LFMP-0.15-A sample tested at lower carbon content. In this sample the coated carbon on LFMP-0.15-A is reduced to 6 wt% from 9wt% by reducing the amount of sucrose. For electrochemical test, the LFMP-0.15-A/PVDF/AB weight ratio is 75:10:15 instead of 70:10:20.

**Table S2** Comparisons of cycling stability of  $\text{LiFe}_x\text{Mn}_{1-x}\text{PO}_4/\text{C}$  ( $x \leq 0.15$ ).

| Sample                     | Charge and discharge rate      | Carbon content (wt%) | Cycle number | Capacity retention | Reference        |
|----------------------------|--------------------------------|----------------------|--------------|--------------------|------------------|
| $x=0$                      | Charge-0.05C<br>Discharge-0.5C | 27.43                | 50           | 88%                | [1]              |
| $x=0$                      | 0.5C                           | 7.0                  | 100          | 87.9%              | [2]              |
| $x=0$                      | 1C                             | –                    | 200          | 95%                | [3]              |
| <b><math>x=0.05</math></b> | <b>10C</b>                     | <b>9</b>             | <b>1000</b>  | <b>64.3%</b>       | <b>This work</b> |
| $x=0.05$                   | 0.1C                           | 10                   | 50           | 93.9%              | [4]              |
| <b><math>x=0.1</math></b>  | <b>10C</b>                     | <b>9</b>             | <b>1000</b>  | <b>65.3%</b>       | <b>This work</b> |
| $x=0.1$                    | Charge-0.1C<br>Discharge-10C   | 10–12                | 100          | 75%                | [5]              |
| $x=0.1$                    | 0.5C                           | 3.69                 | 70           | 74.4%              | [6]              |
| <b><math>x=0.15</math></b> | <b>10C</b>                     | <b>9</b>             | <b>1000</b>  | <b>69.4%</b>       | <b>This work</b> |
| $x=0.15$                   | 1C                             | –                    | 500          | 89%                | [7]              |
| $x=0.15$                   | Charge-0.05C<br>Discharge-0.5C | –                    | 50           | ~92.7%             | [8]              |

## References

- 1 S. M. Oh, S. W. Oh, C. S. Yoon, B. Scrosati, K. Amine and Y. K. Sun, *Adv. Funct. Mater.*, 2010, **20**, 3260–3265.
- 2 H. Guo, C. Y. Wu, J. Xie, S. C. Zhang, G. S. Cao and X. B. Zhao, *J. Mater. Chem. A*, 2014, **2**, 10581–10588.
- 3 D. Y. Wang, H. Buqa, M. Crouzet, G. Deghenghi, T. Drezen, I. Exnar, N. H. Kwon, J. H. Miners, L. Poletto and M. Grätzel, *J. Power Sources*, 2009, **189**, 624–628.
- 4 X. L. Li, S. Liu, H. C. Jin, Y. Meng and Y. F. Liu, *J. Alloys Compd.*, 2014, **614**, 7–12.
- 5 P. J. Zuo, G. Y. Cheng, L. G. Wang, Y. L. Ma, C. Y. Du, X. Q. Cheng, Z. B. Wang and G. P. Yin, *J. Power Sources*, 2013, **243**, 872–879.
- 6 Y. Hong, Z. L. Tang, Z. J. Hong and Z. T. Zhang, *J. Power Sources*, 2014, **248**, 655–659.
- 7 X. Zhou, Y. F. Deng, L. N. Wan, X. S. Qin and G. H. Chen, *J. Power Sources*, 2014, **265**, 223–230.
- 8 Y. K. Sun, S. M. Oh, H. K. Park and B. Scrosati, *Adv. Mater.*, 2011, **23**, 5050–5054.
